# Supplementary material
Source: HighWire-hosted journal article supplement (https://www.cmaj.ca/content/suppl/2007/08/27/177.5.462)
Supplement: hpv-factsheet-f.pdf [file hpv-factsheet-f.pdf]

## FICHE D'INFORMATION SUR LA SANTÉ PUBLIQUE

## Information sur le VPH et le vaccin contre le VPH

## à l'intention des patients

**Qu'est-ce que le VPH?**

Le VPH (virus du papillome humain) est un virus très contagieux propagé par contact cutané. Il peut infecter la peau, la bouche, le rectum et l'anus. Il peut aussi infecter les régions génitales de l'homme et de la femme, y compris la peau du pénis ou de la vulve (région qui entoure le vagin), ainsi que la muqueuse vaginale et le col (partie inférieure de l'utérus reliée au vagin). Il y a plus de 100 types de VPH, dont 40 peuvent être transmis sexuellement.

**Quels sont les signes et symptômes de l'infection génitale à VPH?**

Le VPH peut vivre sur la peau ou les muqueuses, y compris celles du tractus génital, sans causer de signes ou de symptômes. La plupart des gens ne savent pas qu'ils sont infectés par le VPH et la plupart de ceux qui le sont finiront par se débarrasser éventuellement de l'infection naturellement, sans traitement.

Le VPH peut causer l'apparition de condylomes, ou papillomes. Certains types de VPH (appelés types «à faible risque») causent les verrues communes de la peau qui font souvent leur apparition aux mains et aux pieds. D'autres types de VPH à faible risque peuvent provoquer l'apparition de condylomes génitaux. Les condylomes génitaux sont des excroissances ou bosses uniques ou multiples qui ressemblent souvent au chou-fleur et peuvent faire leur apparition sur la vulve, dans le vagin, sur le col, le pénis, le scrotum, à l'aîne ou sur la cuisse. Ces condylomes peuvent faire leur apparition des semaines ou des mois après un contact sexuel avec une personne infectée.

**Le VPH cause-t-il le cancer?**

Oui, il peut le causer. L'infection par certains types de VPH, appelés VPH «à risque élevé», n'entraîne pas l'apparition de condylomes mais peut causer à l'occasion le cancer du col. Plus rarement, ces types de VPH peuvent aussi causer le cancer de la vulve, du vagin, de l'anus ou du pénis. Environ une femme canadienne sur 138 (0,7 %) aura le cancer du col. Chaque année, on enregistre 1300 nouveaux cas diagnostiqués. Chez les 11 millions de femmes du Canada âgées de 15 à 64 ans, 400 mourront du cancer du col chaque année, ce qui en fait la 13<sup>e</sup> cause en importance de mortalité reliée au cancer.

**Comment le VPH est-il transmis?**

L'infection à VPH est une des infections transmises sexuellement les plus répandues au Canada et dans le monde. Jusqu'à 75 % des personnes sexuellement actives seront infectées au moins une fois par le VPH au cours de leur vie. Le VPH génital peut se propager par contact sexuel et par d'autres types d'activités sexuelles comme les rapports.

Dans de rares cas, une femme enceinte infectée par le VPH génital peut transmettre le VPH à son bébé au cours de l'accouchement vaginal. Les bébés peuvent alors avoir une infection à VPH dans la bouche, le larynx ou la gorge.

**Comment les infections à VPH sont-elles diagnostiquées?**

On diagnostique la présence de condylomes génitaux en examinant la région génitale.

On peut détecter une infection à VPH du col en procédant à un frottis de Papanicolaou (Pap), intervention qui consiste à prélever des cellules du col. On envoie ces cellules à un laboratoire, qui les analyse pour déterminer si elles contiennent des changements cancéreux ou précancéreux causés par une infection à VPH.

Tous les types de VPH peuvent causer des changements bénins au niveau des cellules du col. Chez 90 % des femmes, ces changements deviennent impossibles à détecter dans les deux ans. Environ 10 des 40 types de VPH génital peuvent causer des changements du col qui peuvent devenir cancéreux.

**Comment réduire le risque?**

L'abstention de contact génital avec une autre personne ou l'utilisation du condom réduiront le risque d'infection à VPH. Le condom n'est pas efficace à 100 % parce qu'il protège seulement la région recouverte et que les condylomes génitaux non couverts sont infectieux. D'autres méthodes de contrôle des naissances, y compris le diaphragme, la pilule anticonceptionnelle et le DIU, ne protègent pas contre l'infection à VPH. Le test de Pap périodique constitue un moyen très efficace de prévenir la maladie causée par l'infection à VPH.

En juillet 2006, Santé Canada a approuvé un vaccin contre le VPH appelé Gardasil (Merck Frosst), que l'on peut utiliser chez les femmes de 9 à 26 ans. Le vaccin contre le

VPH n'est pas actuellement approuvé pour utilisation chez les hommes au Canada.

Des études ont révélé que des changements précancéreux et cancéreux du col ont fait leur apparition chez 1 % (86/8268) des femmes non vaccinées et chez 0,01 % (1/8301) des femmes vaccinées. Des condylomes génitaux ont fait leur apparition chez environ 3 % (60/2278) des femmes non vaccinées, mais chez aucune femme vaccinée.

**Que contient le vaccin contre le VPH?**

Le vaccin contre le VPH contient des protéines inactives purifiées qui proviennent des quatre types les plus répandus de VPH, soit les types 6 et 11 (qui causent 90 % des condylomes génitaux) et 16 et 18 (qui causent 70 % des cancers du col). Le vaccin ne protège pas contre d'autres types de VPH et ne contient pas d'antibiotique ni de préservatif comme le thimerosal.

**Comment agit le vaccin?**

Il faut trois injections du vaccin, à 0, 2 et 6 mois. Le vaccin est efficace principalement chez les femmes qui n'ont pas encore été exposées au VPH et c'est pourquoi on recommande de vacciner les femmes avant qu'elles deviennent actives sexuellement. Le vaccin protège pendant au moins 5,5 ans et des études en cours visent à déterminer si une dose d'appoint sera nécessaire.

Même avec le vaccin, il est essentiel de se soumettre à des tests de Pap périodiques parce que le vaccin ne protège pas contre tous les types de VPH qui peuvent causer le cancer du col.

**Le vaccin est-il inoffensif?**

Oui. La sensibilité autour du point d'injection dans le bras constitue l'effet secondaire le plus courant. On a signalé quelques autres effets secondaires mineurs au cours des études.

**Combien en coûte-t-il?**

Au Canada et aux États-Unis, le vaccin coûte entre 400 \$ et 500 \$ pour les trois doses requises, soit environ 150 \$ la dose. Au Royaume-Uni, chaque dose coûte environ 80 £, pour un total d'environ 240 £.

**Tavé van Zyl**

Stagiaire d'été, JAMC

**Eric Wooltorton MD MSc**

Rédacteur associé, JAMC

**Noni MacDonald MD MSc**

Rédactrice de la section

Santé publique, JAMC

Intérêts concurrents : Aucun déclaré.
